# Supplementary material for: Synthesis of mesoporous ceria using metal- and halogen-free ordered mesoporous carbon as a hard template
Source: Royal Society of Chemistry journal article supplement (doi:10.1039/c9na00482c), 2019-01-01
Supplement: c9na00482c1.pdf [file c9na00482c1.pdf]

Supporting Information for:

**Synthesis of Mesoporous Ceria using Metal- and Halogen-Free Ordered  
Mesoporous Carbon as a Hard Template**

by

*Farzeen Sakina<sup>a</sup>, Juan Manuel Muñoz-Ocaña<sup>b</sup>, Ainuona Bouziane<sup>b</sup>, Miguel Lopez-  
Haro<sup>b</sup>, Richard T. Baker\**

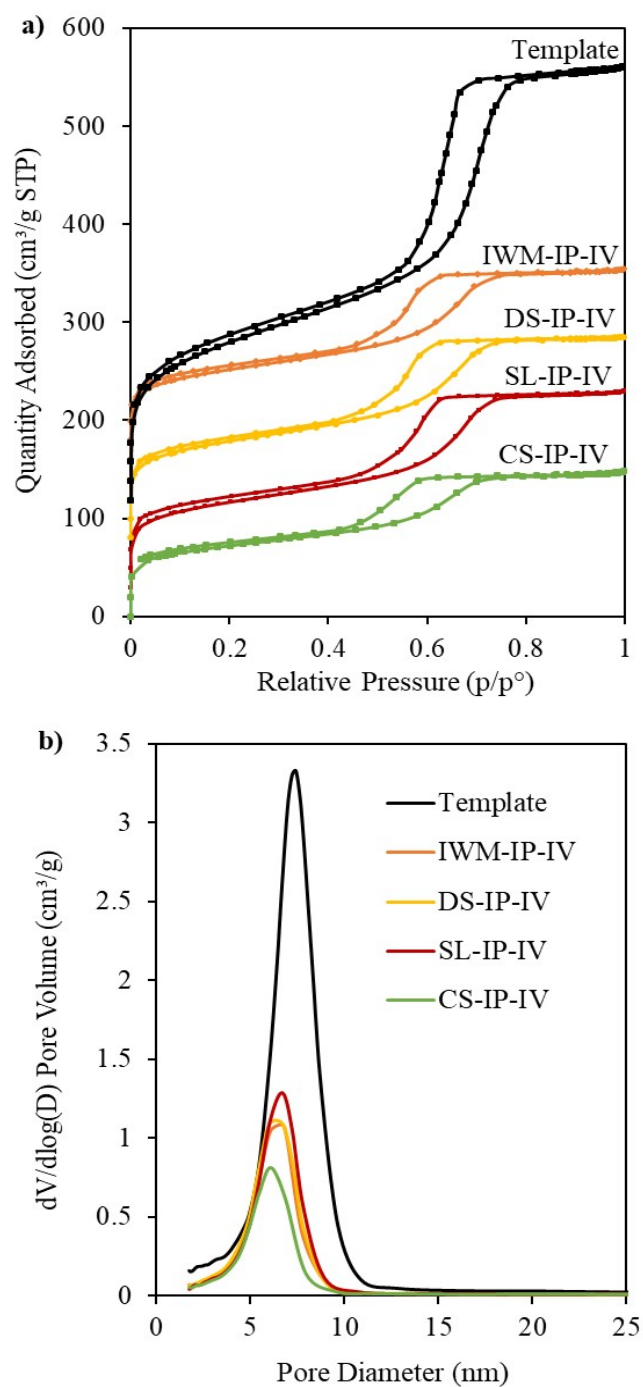

**Figure S1.** (a) Nitrogen physisorption isotherms and (b) Pore size distributions of OMC Template, IW-IP, DS-IP, SL-IP, and CS-IP.

*Isotherm plots are shifted on the y-axis for clarity.*

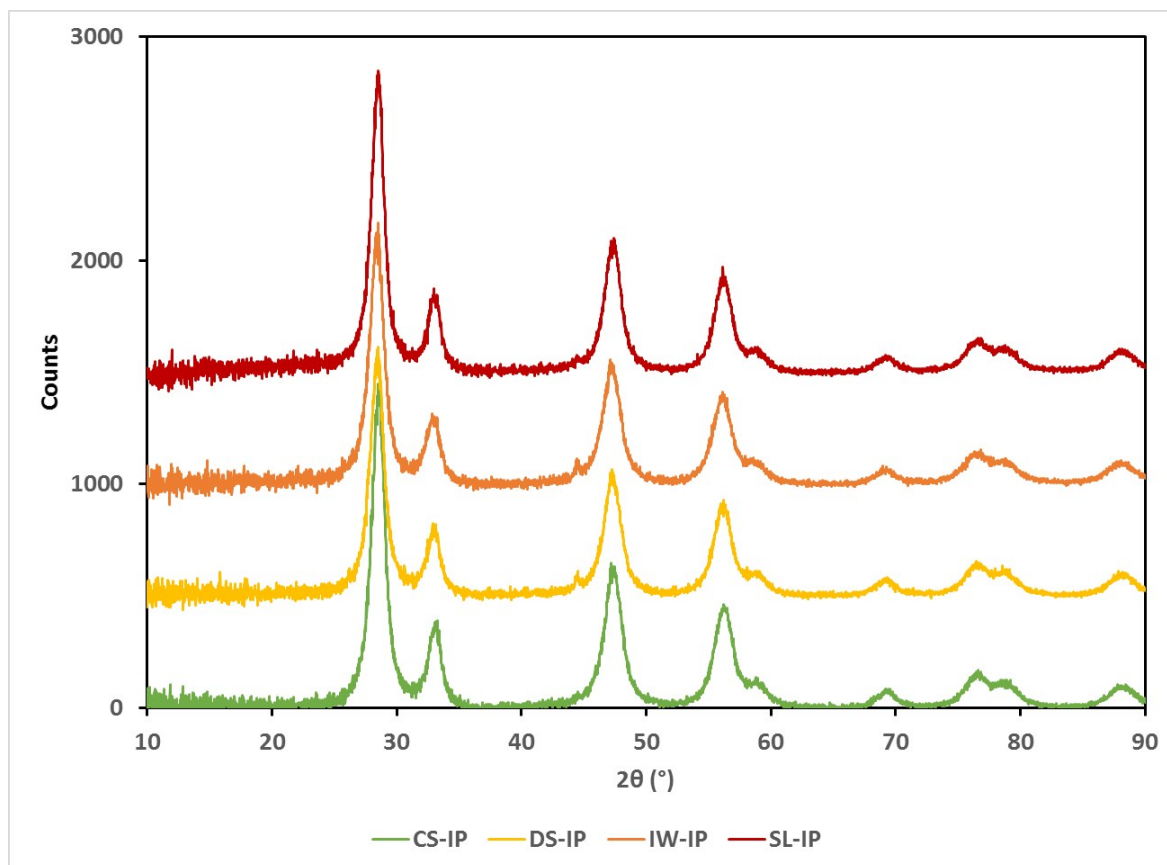

**Figure S2.** WAXRD patterns of the intermediate mesoporous ceria products (still containing OMC template): IW-IP, DS-IP, SL-IP, and CS-IP. Plots are shifted on the y-axis for clarity.

**Table S1. Unit cell parameters of all Ceria samples calculated from WAXRD patterns**

| Sample ID | Unit cell parameter (nm) |
|-----------|--------------------------|
| SL        | 0.542                    |
| IW        | 0.542                    |
| DS        | 0.542                    |
| CS        | 0.542                    |
| 350       | 0.539                    |
| 400       | 0.544                    |
| 500       | 0.542                    |
| 600       | 0.544                    |
| 800       | 0.539                    |

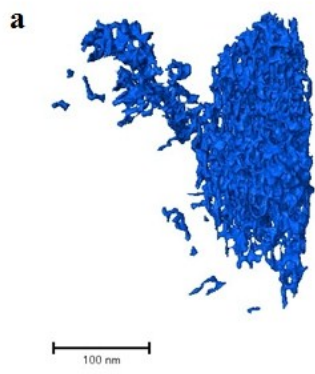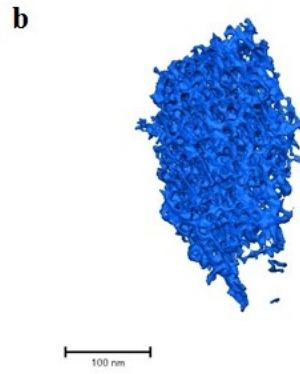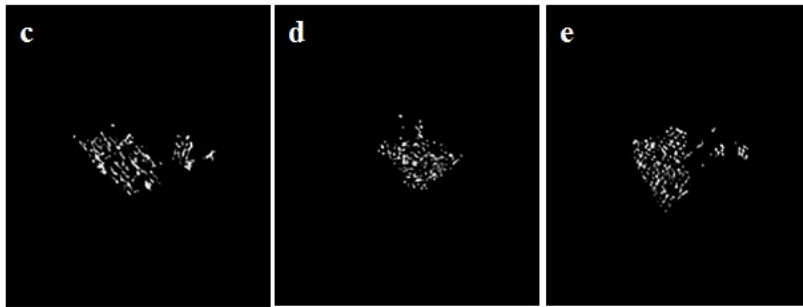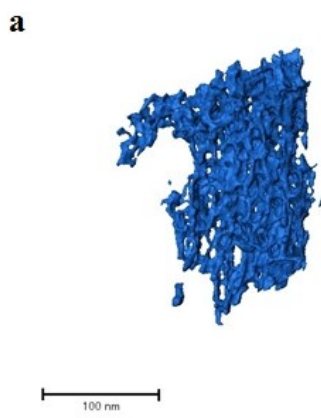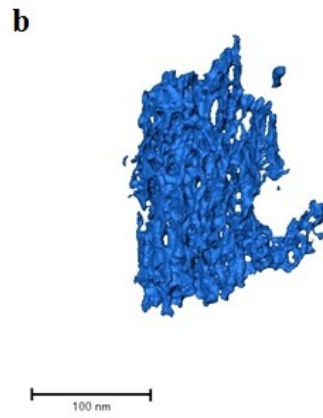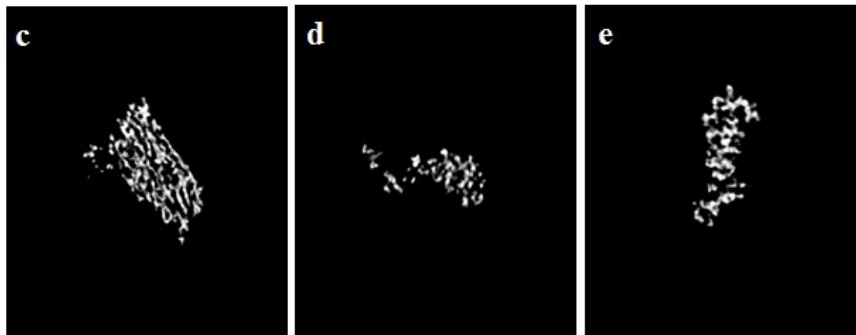

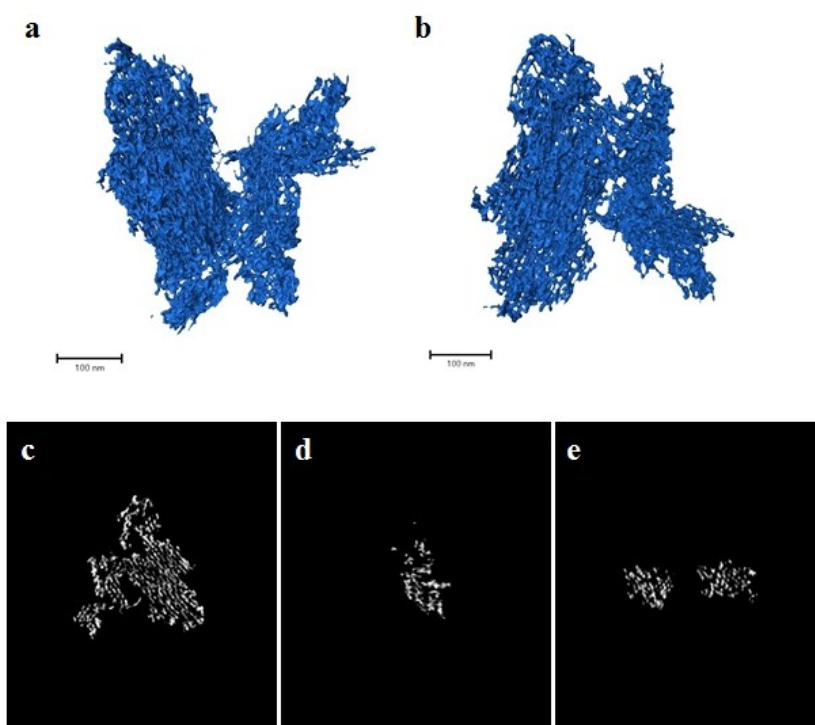

**Figures S3, S4, S5.** Electron Tomography results corresponding to different SL-Ceria samples: (a,b) perspective views of the rendered volume obtained after reconstruction; (c-e) orthoslices through the reconstructed volume in directions parallel (c) and perpendicular (d,e) to the axes of the CeO<sub>2</sub> nanorods.
